# Supplementary material for: Indocyanine-green-loaded microbubbles for localization of sentinel lymph node using near-infrared fluorescence/ultrasound imaging: a feasibility study
Source: Royal Society of Chemistry journal article supplement (doi:10.1039/c5ra26814a), 2016-01-01
Supplement: c5ra26814a1.pdf [file c5ra26814a1.pdf]

中南大学湘雅二医院医学伦理委员会  
科研项目伦理审批件

(2014) 伦审第 (研 075) 号

|                                                                                                           |       |                                                                                                                                                       |       |       |      |                  |  |
|-----------------------------------------------------------------------------------------------------------|-------|-------------------------------------------------------------------------------------------------------------------------------------------------------|-------|-------|------|------------------|--|
| 项目名称                                                                                                      |       | 新型液气相变双靶向纳米超声造影剂分子显像肿瘤细胞实验研究                                                                                                                          |       |       |      |                  |  |
| 研究分类                                                                                                      |       | 1√ 2√ 3√ 4□                                                                                                                                           |       | 标本种类  |      | 1√2□ 3□ 4√ 5√ 6√ |  |
| 申办单位                                                                                                      |       | 中南大学湘雅二医院                                                                                                                                             |       |       |      |                  |  |
| 承担专业                                                                                                      |       | 超声诊断科                                                                                                                                                 |       | 承担责任  |      | 负责√ 参与□          |  |
|                                                                                                           |       |                                                                                                                                                       |       | 主要研究者 |      | 牛诚诚              |  |
| 提交材料                                                                                                      | 试验方案  |                                                                                                                                                       | 有√ 无□ |       | 合作单位 | 无                |  |
|                                                                                                           | 知情同意书 |                                                                                                                                                       | 有√ 无□ |       |      |                  |  |
|                                                                                                           | 参考文献  |                                                                                                                                                       | 有√ 无□ |       |      |                  |  |
| 专业负责人对项目涉及伦理问题的审核意见:                                                                                      |       | 该项目 <input checked="" type="checkbox"/> 是 <input type="checkbox"/> 否 <input type="checkbox"/> 符合医学伦理原则及道德要求<br>专业负责人签名: <u>司志昌</u> 日期 <u>2014.3.9</u> |       |       |      |                  |  |
| 湘雅二医院医学伦理委员会意见:                                                                                           |       | 同意该项目进行申报, 项目开展实施之前应向伦理委员会申请对研究方案、知情同意书等内容进行会议审查。<br><br>2014年03月10日<br>医学伦理委员会盖章                                                                     |       |       |      |                  |  |
| 备注: 研究分类: 1=观察性研究; 2=干预性研究; 3=理论性研究; 4=其他(调查研究)<br>标本种类: 1=病理组织; 2=外周血; 3=病例资料; 4=动物; 5=细胞株; 6=其他(影像学等资料) |       |                                                                                                                                                       |       |       |      |                  |  |
